# Supplementary material for: Sequential elucidation of the β-Ca3(PO4)2/TiO2 composite development from the solution precursors
Source: Royal Society of Chemistry journal article supplement (doi:10.1039/c7dt00090a), 2017-01-01
Supplement: c7dt00090a1.pdf [file c7dt00090a1.pdf]

## “Supporting Information”

### Sequential elucidation on the $\beta$ -Ca<sub>3</sub>(PO<sub>4</sub>)<sub>2</sub>/*r*-TiO<sub>2</sub> composite development from the solution precursors

P. Nandha Kumar and S. Kannan\*

*<sup>a</sup>Centre for Nanoscience and Technology,  
Pondicherry University, Puducherry-605 014, INDIA*

#### Contents:

#### *Supplementary figure*

- Fig. S1** XRD patterns of the  $\beta$ -Ca<sub>3</sub>(PO<sub>4</sub>)<sub>2</sub>-*r*-TiO<sub>2</sub> composites recorded at 1100 °C.
- Fig. S2** Refined diffraction patterns of five different calcium phosphate contained titania compositions at 900 °C. **Figs. S2a, b, c, d** and **e** respectively correspond to the refined patterns of 1CPTI, 2CPTI, 3CPTI, 4CPTI and 5CPTI. Calculated (Red lines); Background (Yellow lines); Difference (Pink lines); Bragg of  $\beta$ -Ca<sub>3</sub>(PO<sub>4</sub>)<sub>2</sub> (Green ticks); Bragg of  $\alpha$ -TiO<sub>2</sub> (Blue ticks); Bragg of *r*-TiO<sub>2</sub> (Brown ticks).
- Fig. S3** Refined diffraction patterns of the TCPTI. Calculated (Red lines); Background (Yellow lines); Difference (Pink lines); Bragg of  $\beta$ -Ca<sub>3</sub>(PO<sub>4</sub>)<sub>2</sub> (Green ticks).
- Fig. S4** Scanning electron micrographs and their associated elemental mappings for the 1CPTI (**Fig. S4a**) and 5CPTI (**Fig. S4b**) composites.

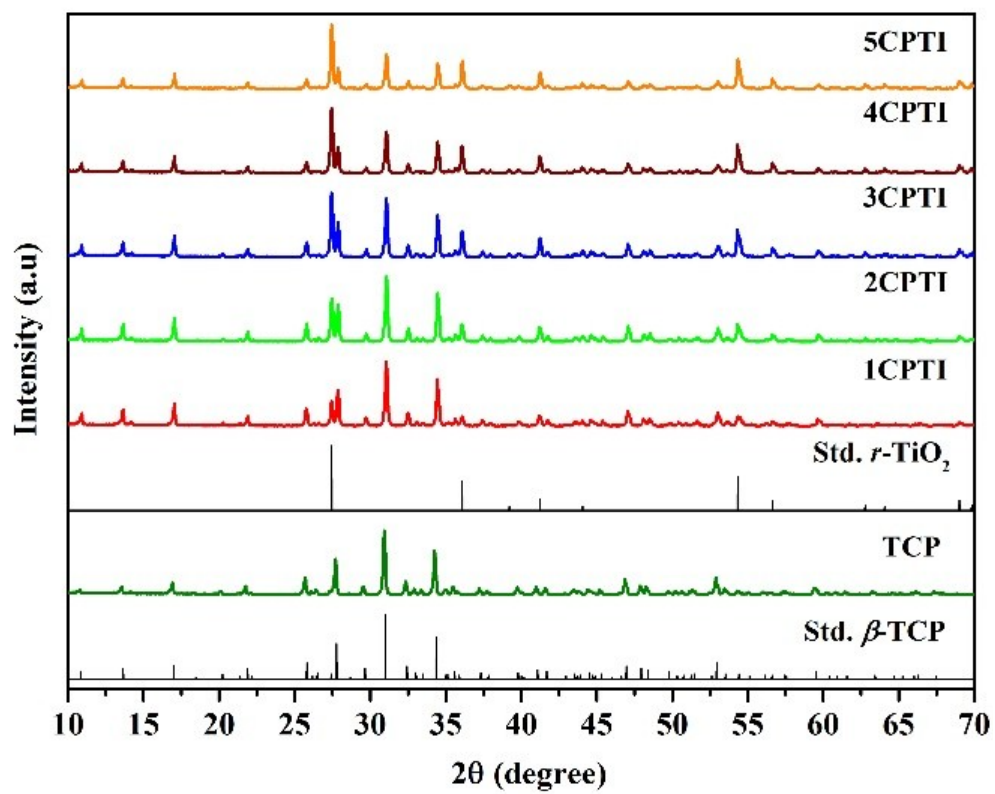

Fig. S1

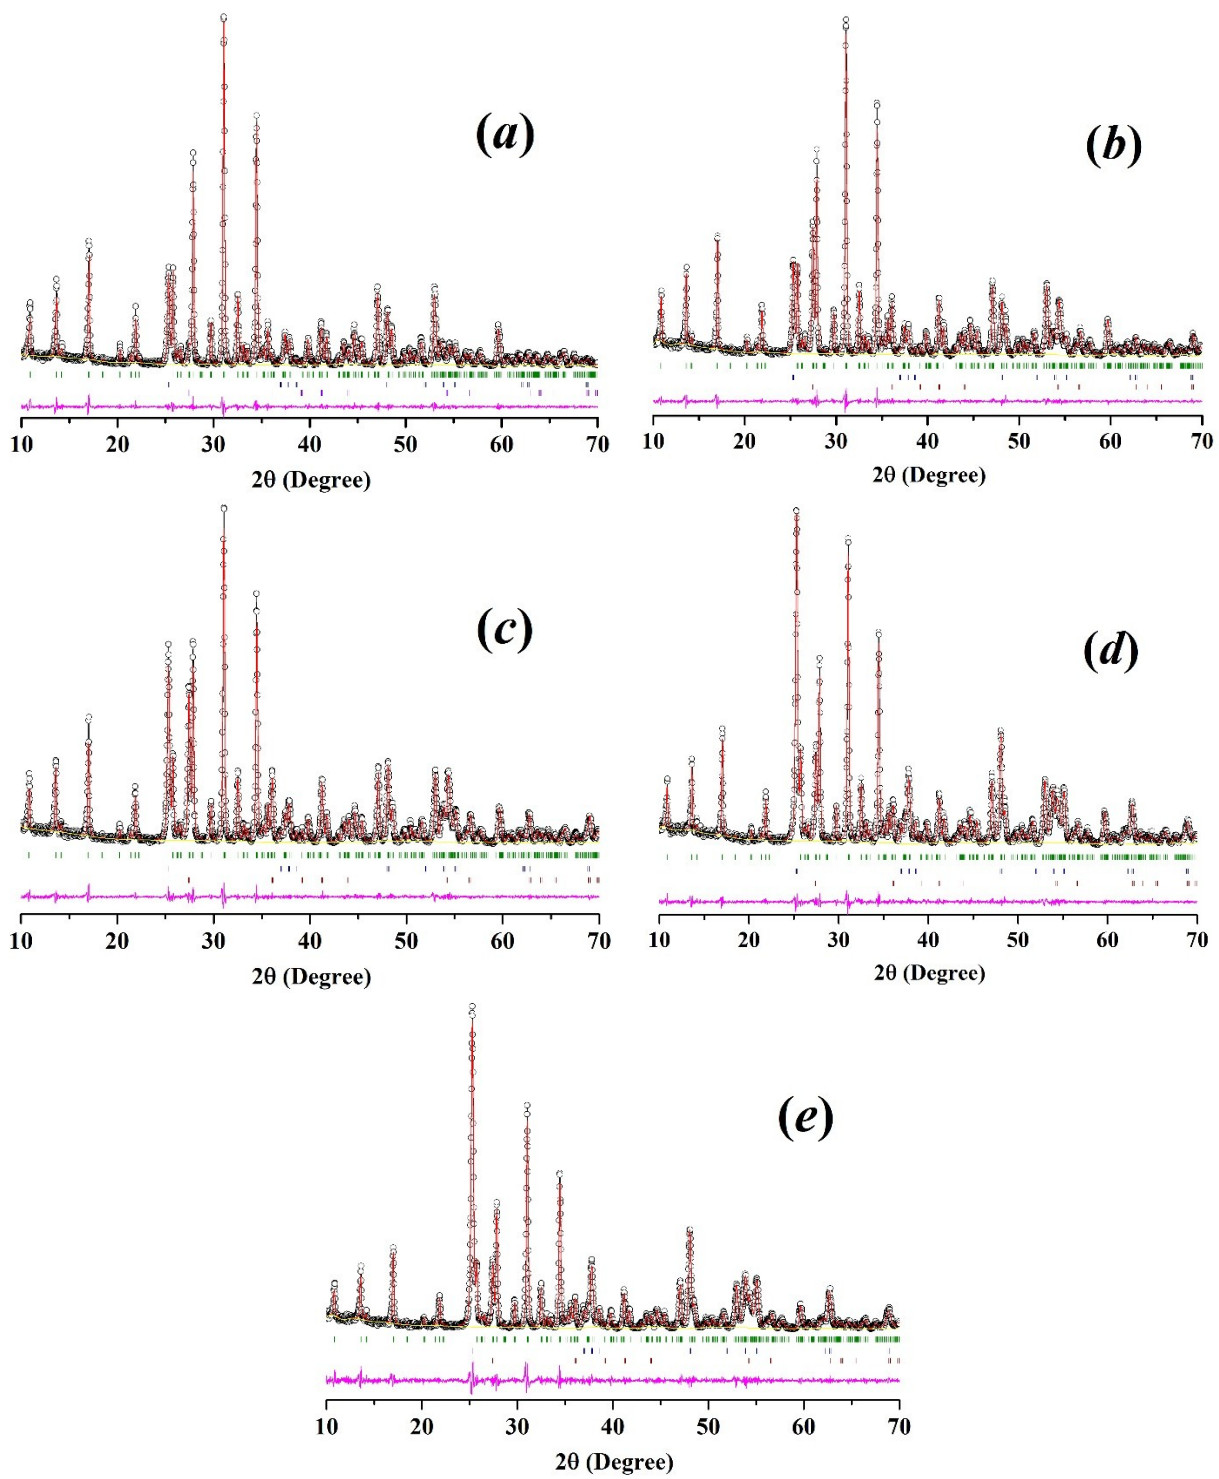

Fig. S2

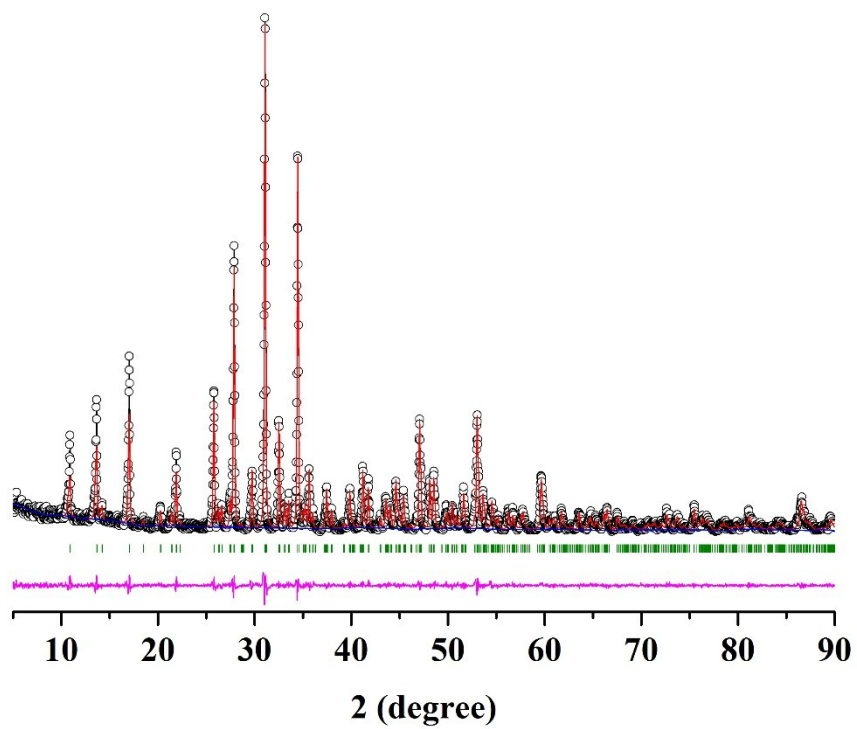

Fig. S3

|                |                                                                                     |                                                                                      |
|----------------|-------------------------------------------------------------------------------------|--------------------------------------------------------------------------------------|
| <b>SEM</b>     | 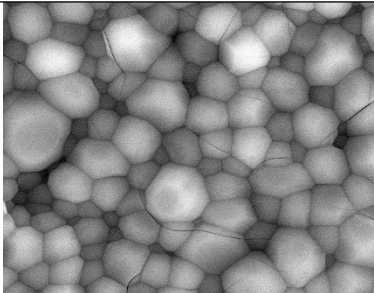   |    |
| <b>Ca</b>      |    |    |
| <b>P</b>       |   |   |
| <b>Ti</b>      |  |  |
| <b>O</b>       |  |  |
| <b>Overall</b> |  |  |

**Fig. S4**
